# Supplementary material for: In situ chemical vapor reaction in molten salts for preparation of platinum nanosheets via bubble breakage
Source: Royal Society of Chemistry journal article supplement (doi:10.1039/c2jm31422c), 2012-01-01
Supplement: c2jm31422c.pdf [file c2jm31422c.pdf]

## Supporting Information

### In Situ Chemical Vapor Reaction in Molten Salts for Preparation of Platinum Nanosheets *via* Bubble Breakage†

Haidong Zhao,<sup>ac, §</sup> Jianbo Wu,<sup>b, §</sup> Hongjun You,<sup>a, §</sup> Shengchun Yang,<sup>\*a</sup> Bingjun Ding,<sup>a</sup> Zhimao Yang,<sup>a</sup> Xiaoping Song,<sup>a</sup> and Hong Yang<sup>\*b</sup>

<sup>a</sup> School of Science, State Key Laboratory for Mechanical Behavior of Materials, Ministry of Education Key Laboratory for Non-Equilibrium Synthesis and Modulation of Condensed Matter, Xi'an Jiaotong University, Xi'an 710049, Shann Xi, People's Republic of China.

<sup>b</sup> Department of Chemical and Biomolecular Engineering, University of Illinois at Urbana-Champaign, 114 Roger Adams Laboratory, MC-712, 600 S. Mathews Avenue, Urbana, IL 61801, USA

<sup>c</sup> School of Chemistry and Chemical Engineering, Shanxi Datong University, Datong 037009, People's Republic of China

\*Corresponding authors: Shengchun Yang (Email: ysch1209@mail.xjtu.edu.cn);  
Hong Yang (Email: hy66@illinois.edu)

§ These authors contributed equally to this work.

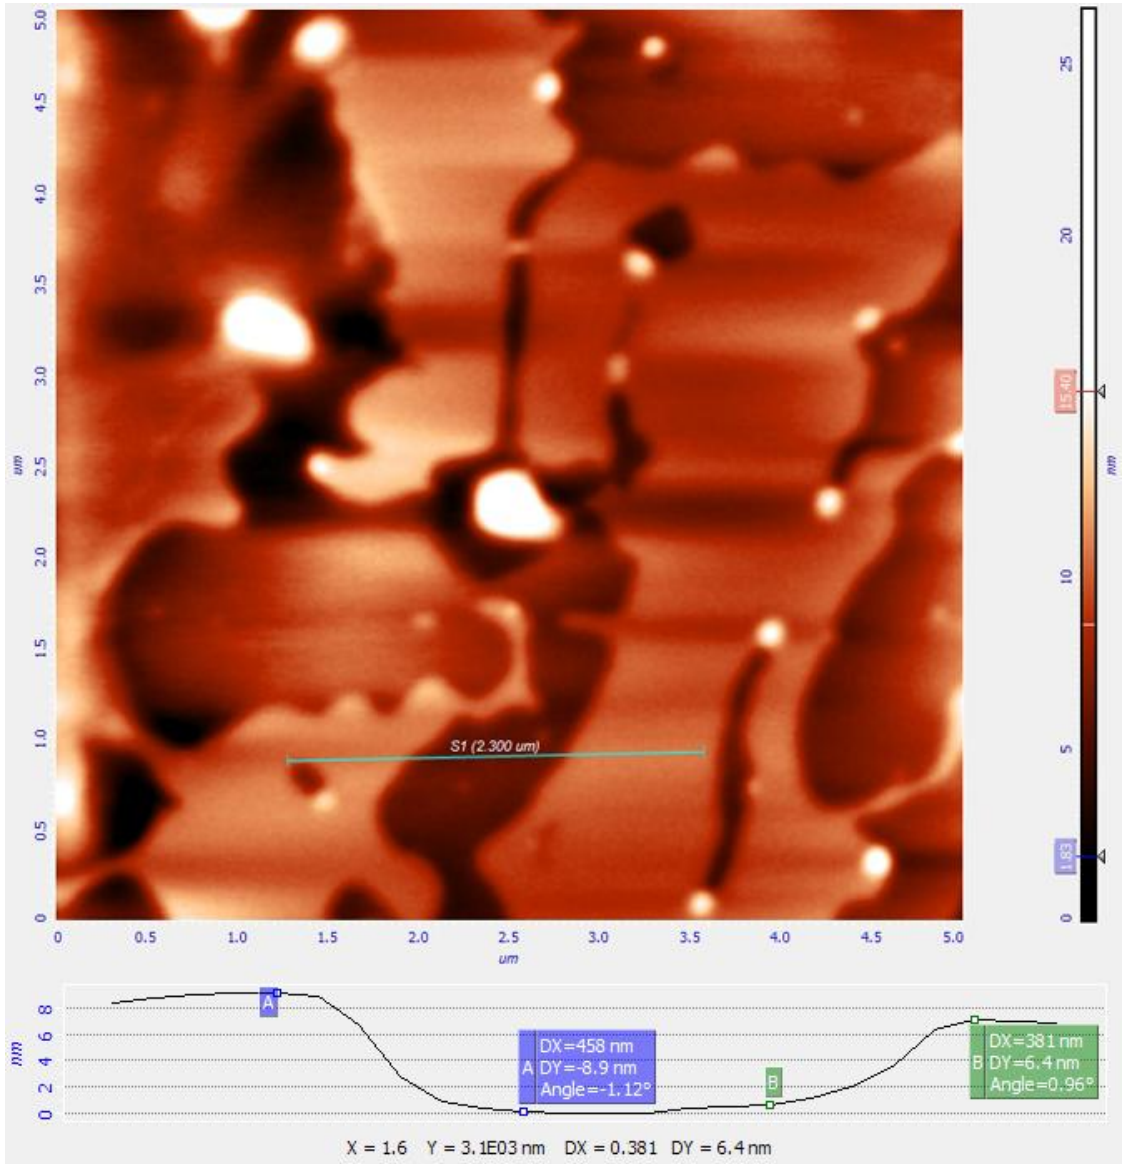

**Figure S1.** AFM measurement of Pt nanosheets showing the thickness to be 8.9 nm.

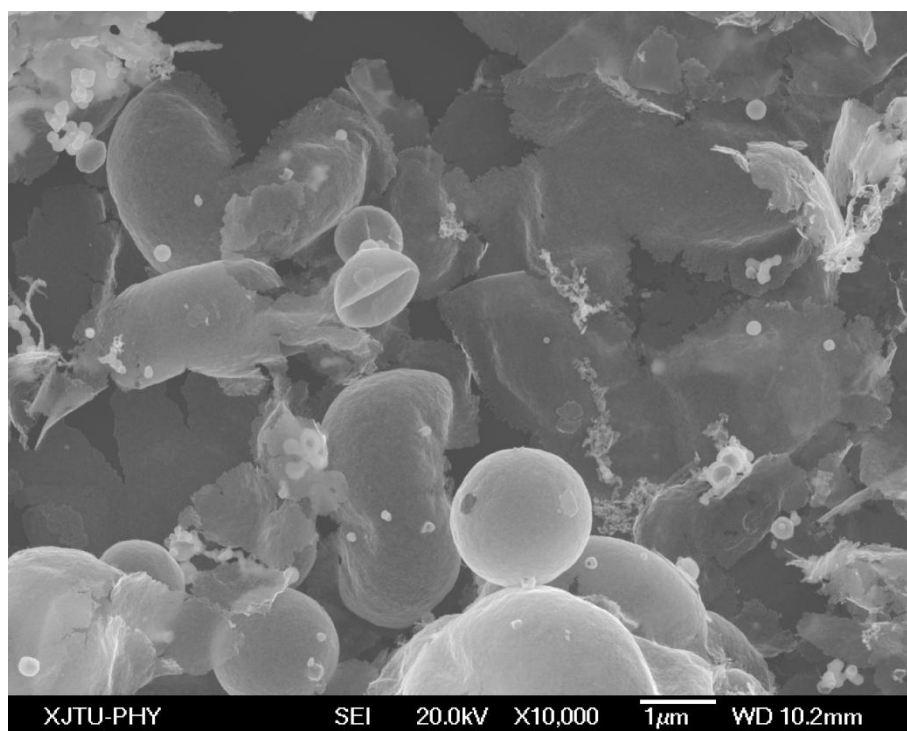

**Figure S2.** SEM image of the platinum hollow spheres and nanosheets showing their coexistence in the same sample.

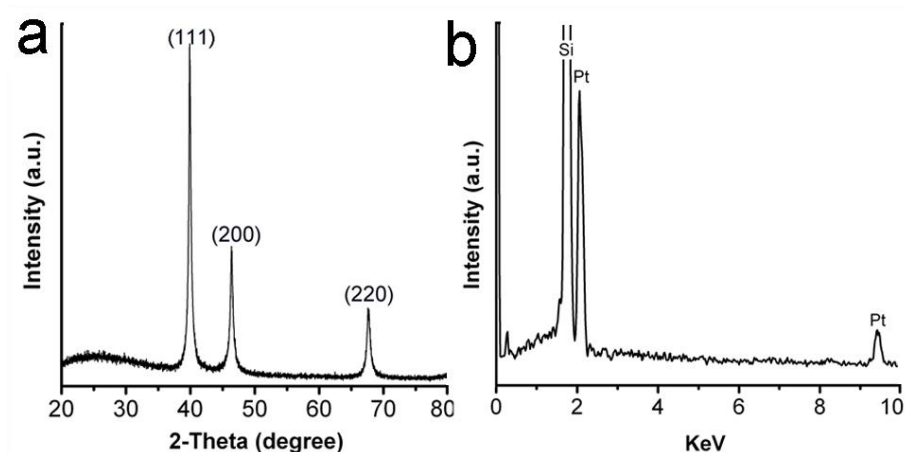

**Figure S3.** (a) XRD pattern and (b) EDX spectrum of Pt nanosheets and hollow spheres.

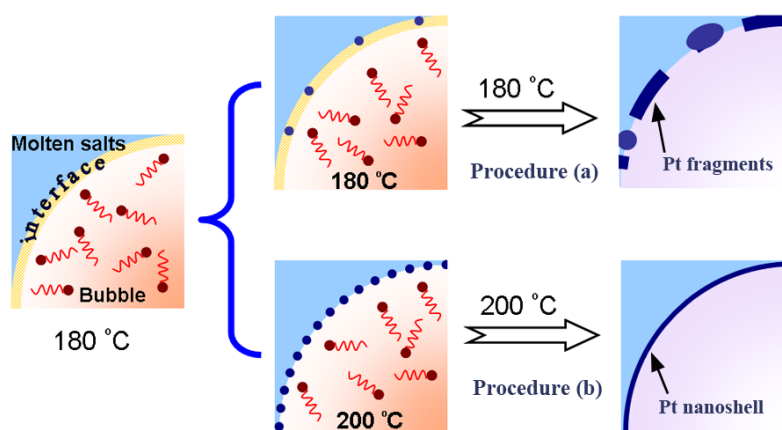

**Figure S4.** Schematic of Pt nanostructures formed using two different procedures: (a) the reaction was kept at 180 °C and the final products were irregular Pt fragments; (b) the reaction temperature was increased to 200 °C after kept at 180 °C for 2 min and the final products were nano-shells/sheets.

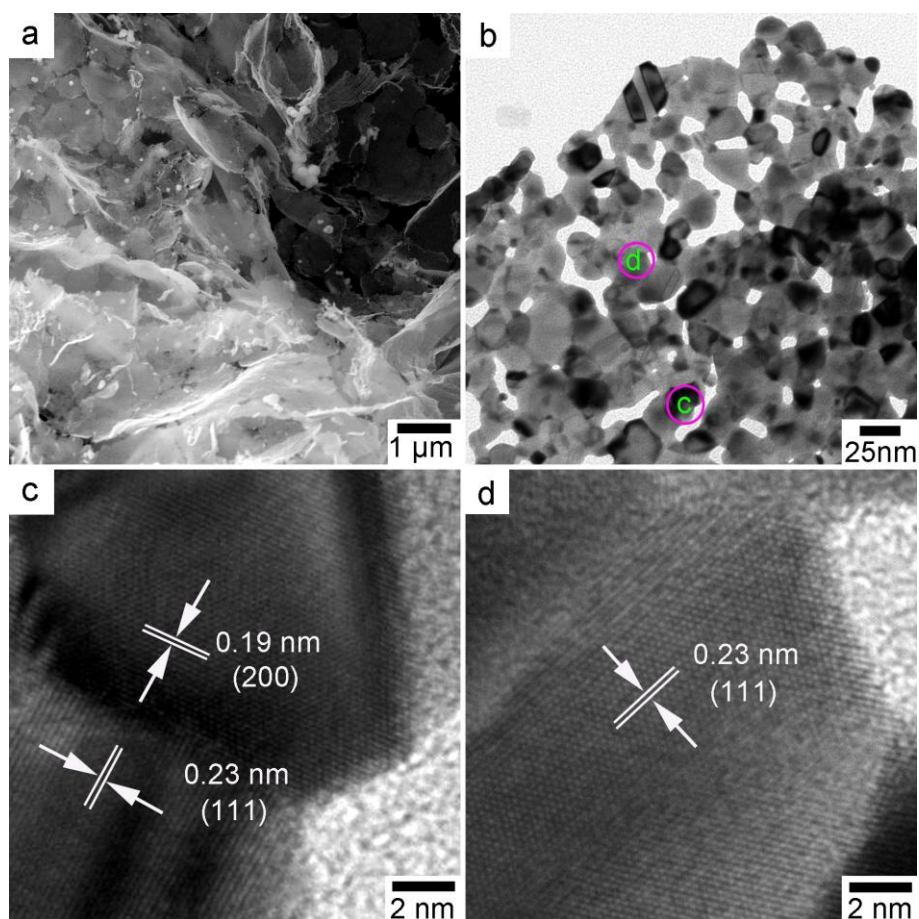

**Figure S5.** (a) SEM and (b) TEM images of self-supported Pt nanosheets after the 30,000 potential cycles. (c and d) HRTEM images of those regions labeled with “c” and “d” in (b), respectively.
